# Supplementary material
Source: PubMed Central journal article supplement (PMC4159424)
Supplement: NIHMS593685-supplement-1.pdf [file NIHMS593685-supplement-1.pdf]

## **Supplementary Information**

### **Non-canonical Wnt4 prevents skeletal aging and inflammation by inhibiting NF- $\kappa$ B**

Bo Yu, Jia Chang, Yunsong Liu, Jiong Li, Kareena Kevork, Khalid Al Hezaimi, Dana T. Graves, No-Hee Park, Cun-Yu Wang

Supplementary Figures 1–7

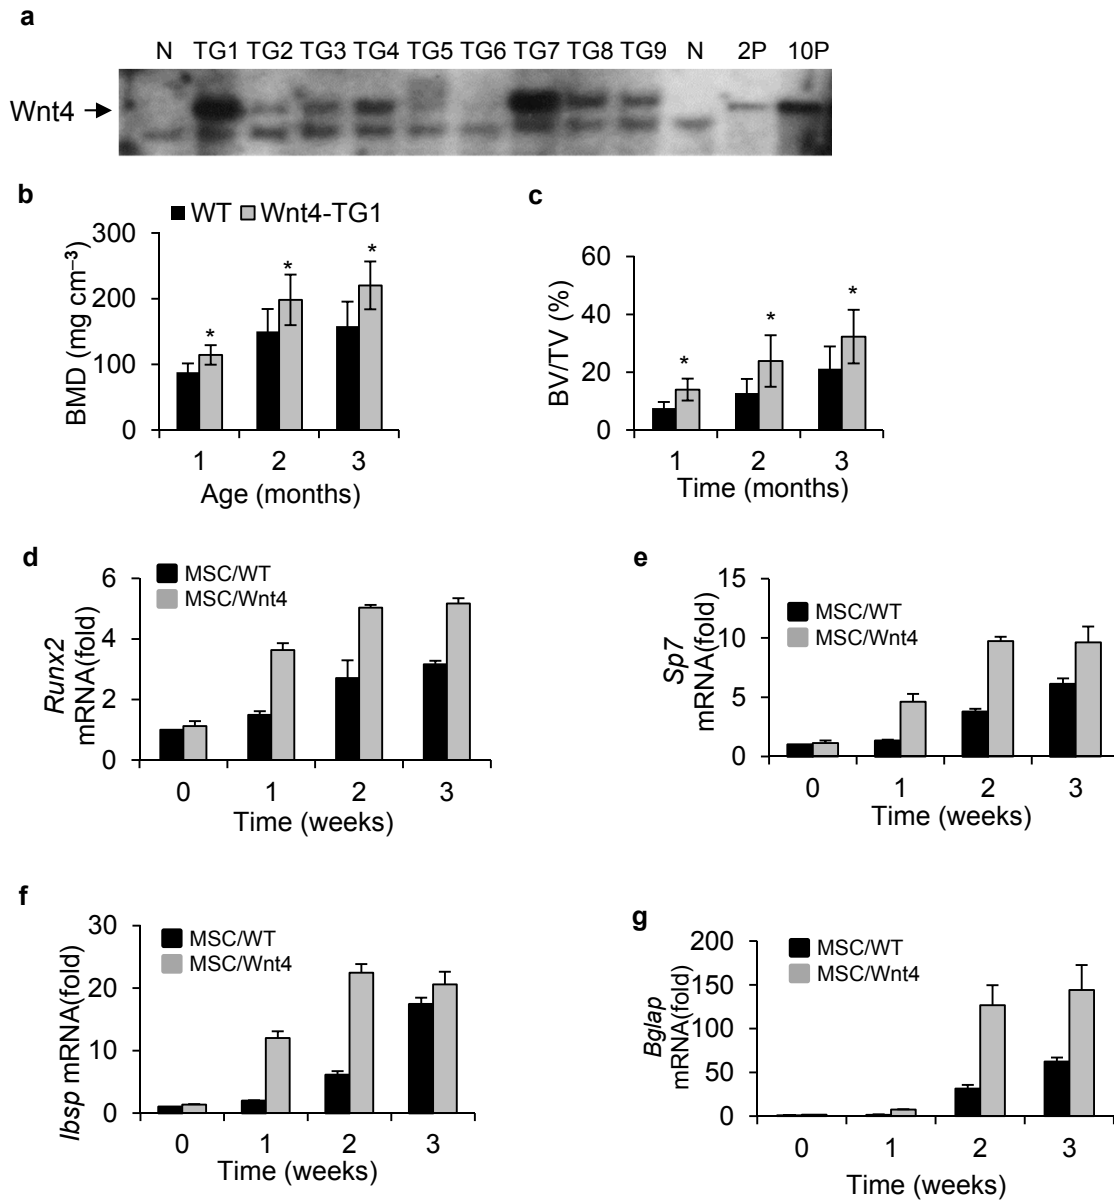

**Supplementary Figure 1** Wnt4 promotes postnatal bone formation *in vivo*. (a) Southern blot of Wnt4 transgene expression in 10 founder mouse lines. (b–c)  $\mu$ CT analysis of BMD (b) and BV/TV (c) of 1-, 2- and 3-month-old WT and Wnt4 mice (TG-1).  $n = 10$  mice per group. \*  $P < 0.05$ . (d–g) Real time RT-PCR analysis of osteogenic marker genes including *Runx2* (d), *Sp7* (e), *Ibsp* (f) and *Bglap* (g) mRNA expression in primary bone marrow MSCs isolated from femurs of 3-month-old WT and Wnt4 mice, after osteogenic induction treatment for indicated times.

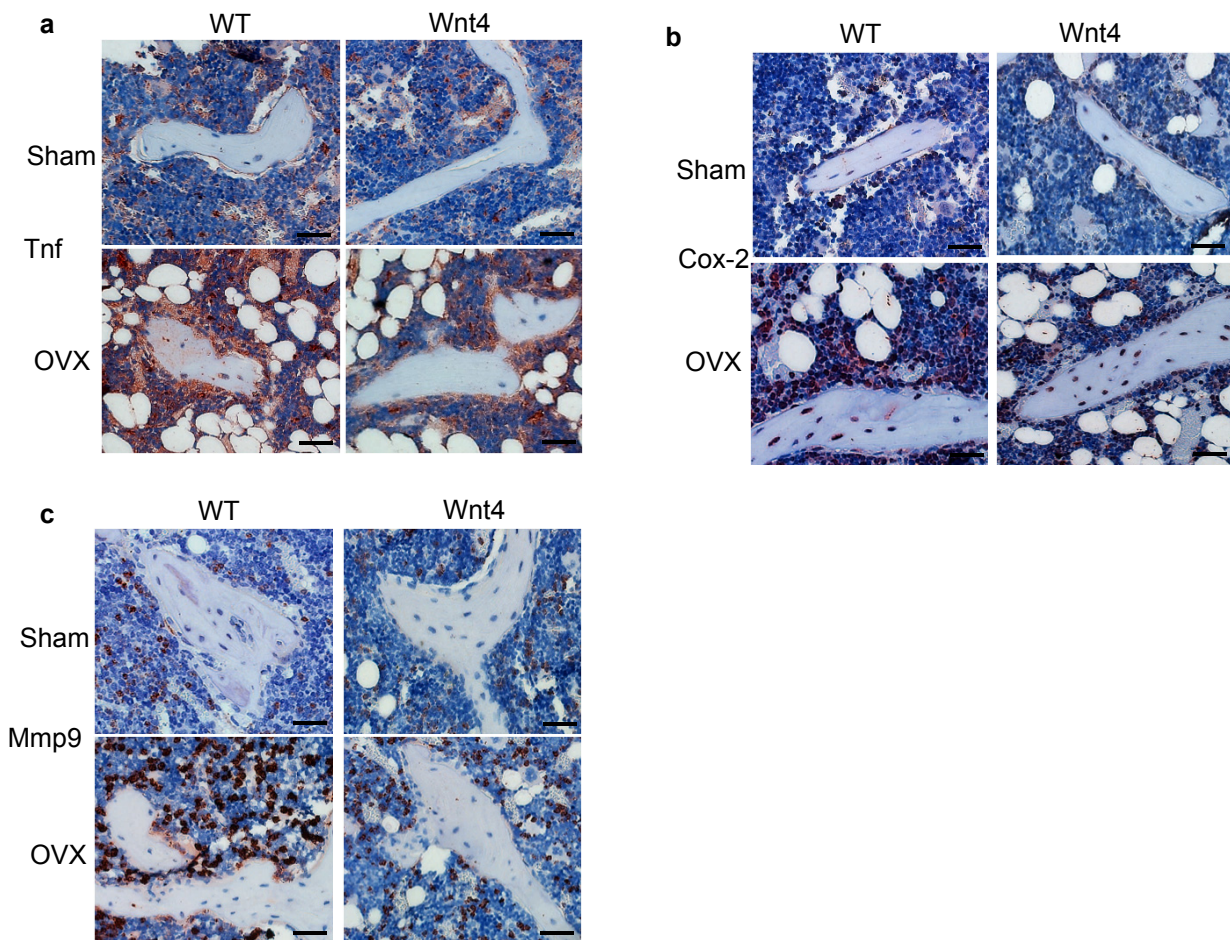

**Supplementary Figure 2** Wnt4 attenuates the expression of NF-κB-regulated molecules *in vivo* induced by OVX. (**a–c**) Immunostaining of NF-κB-dependent Tnf (**a**), Cox-2 (**b**), and Mmp9 (**c**) surrounding trabecular bones in the distal metaphysis of WT and Wnt4 mice two months after OVX or sham operation. Scale bars, 60 μm.

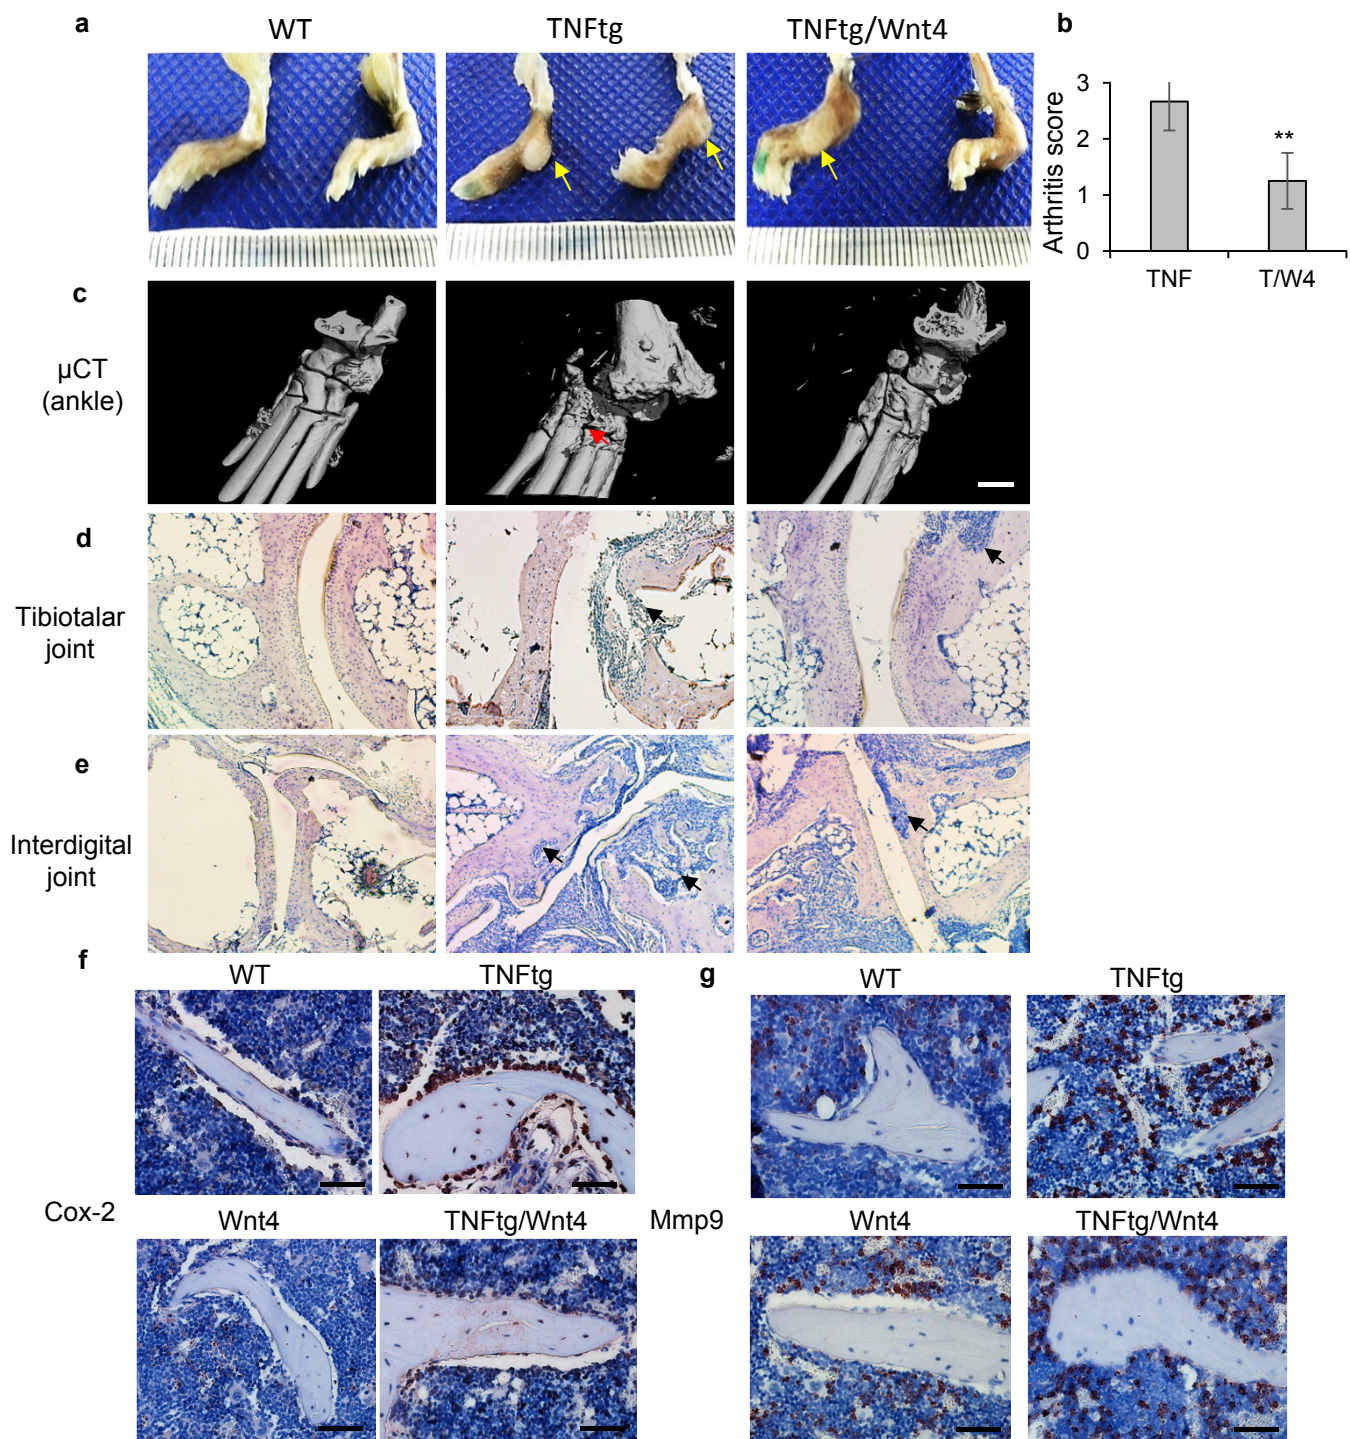

**Supplementary Figure 3** Wnt4 alleviates arthritis induced by TNF. **(a–c)** Photographs of hindpaws and ankle joints **(a)** showing swelling (yellow arrow) as well as  $\mu$ CT reconstruction of ankle and tibiotalar joints **(c)** showing bony erosions (red arrow) from 12-month-old WT, TNFtg and TNFtg/Wnt4 mice. Average arthritis scores **(b)** were given based on the degree of swelling and joint deviation.  $n = 8$  hindpaws for WT and TNFtg/Wnt4 groups;  $n = 4$  hindpaws for TNFtg group. \*\*  $P < 0.01$ . **(d–e)** H&E staining of tibiotalar **(d)** and interdigital **(e)** joints showing joint cartilage destruction and bone erosions due to invasion of inflammatory cells (black arrows). **(f,g)** Immunostaining of NF- $\kappa$ B-dependent Cox-2 **(f)** and Mmp9 **(g)** in distal femoral metaphysis of 12-month-old WT, Wnt4, TNFtg and TNFtg/Wnt4 mice. Scale bar, 1 mm **(c)**; 200  $\mu$ m **(d–e)**; 40  $\mu$ m **(f–g)**.



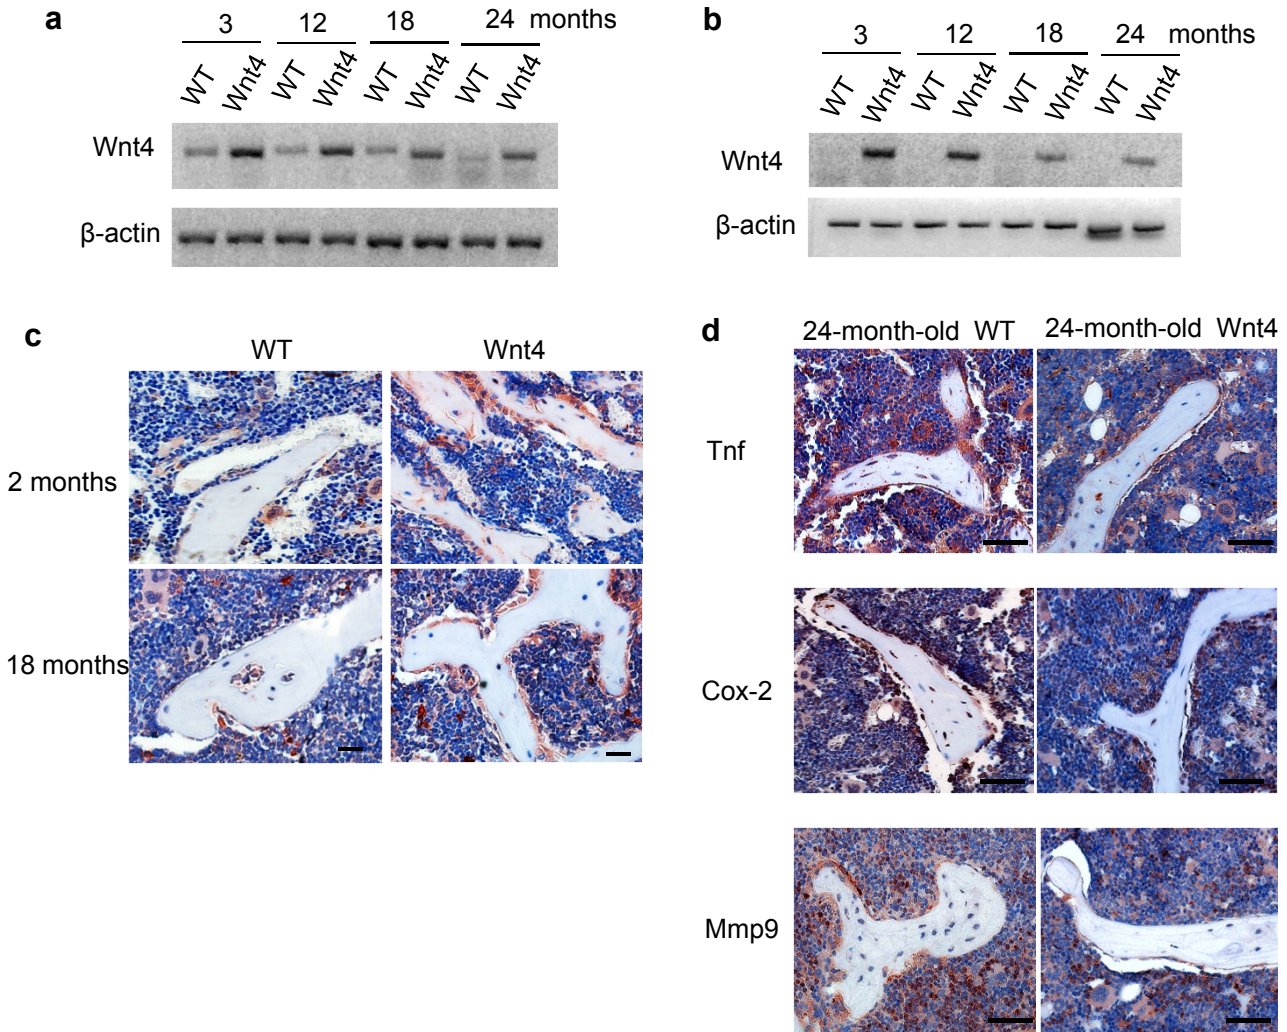

**Supplementary Figure 4** Wnt4 attenuated the expression of NF-κB-regulated molecules in aging mice. (a) RT-PCR of endogenous and transgenic Wnt4 mRNA expression in Wnt4 mice and WT mice of various ages. (b) RT-PCR of Wnt4 transgene mRNA expression in Wnt4 mice and WT mice of various ages. (c) Immunostaining of Wnt4 proteins in young (2-month-old) and aged (18-month-old) WT and Wnt4 mice. (d) Immunostaining of NF-κB-dependent Tnf, Cox-2 and Mmp9 in distal metaphysis of 24-month-old WT and Wnt4 mice. Scale bars, 40μm (c–d).

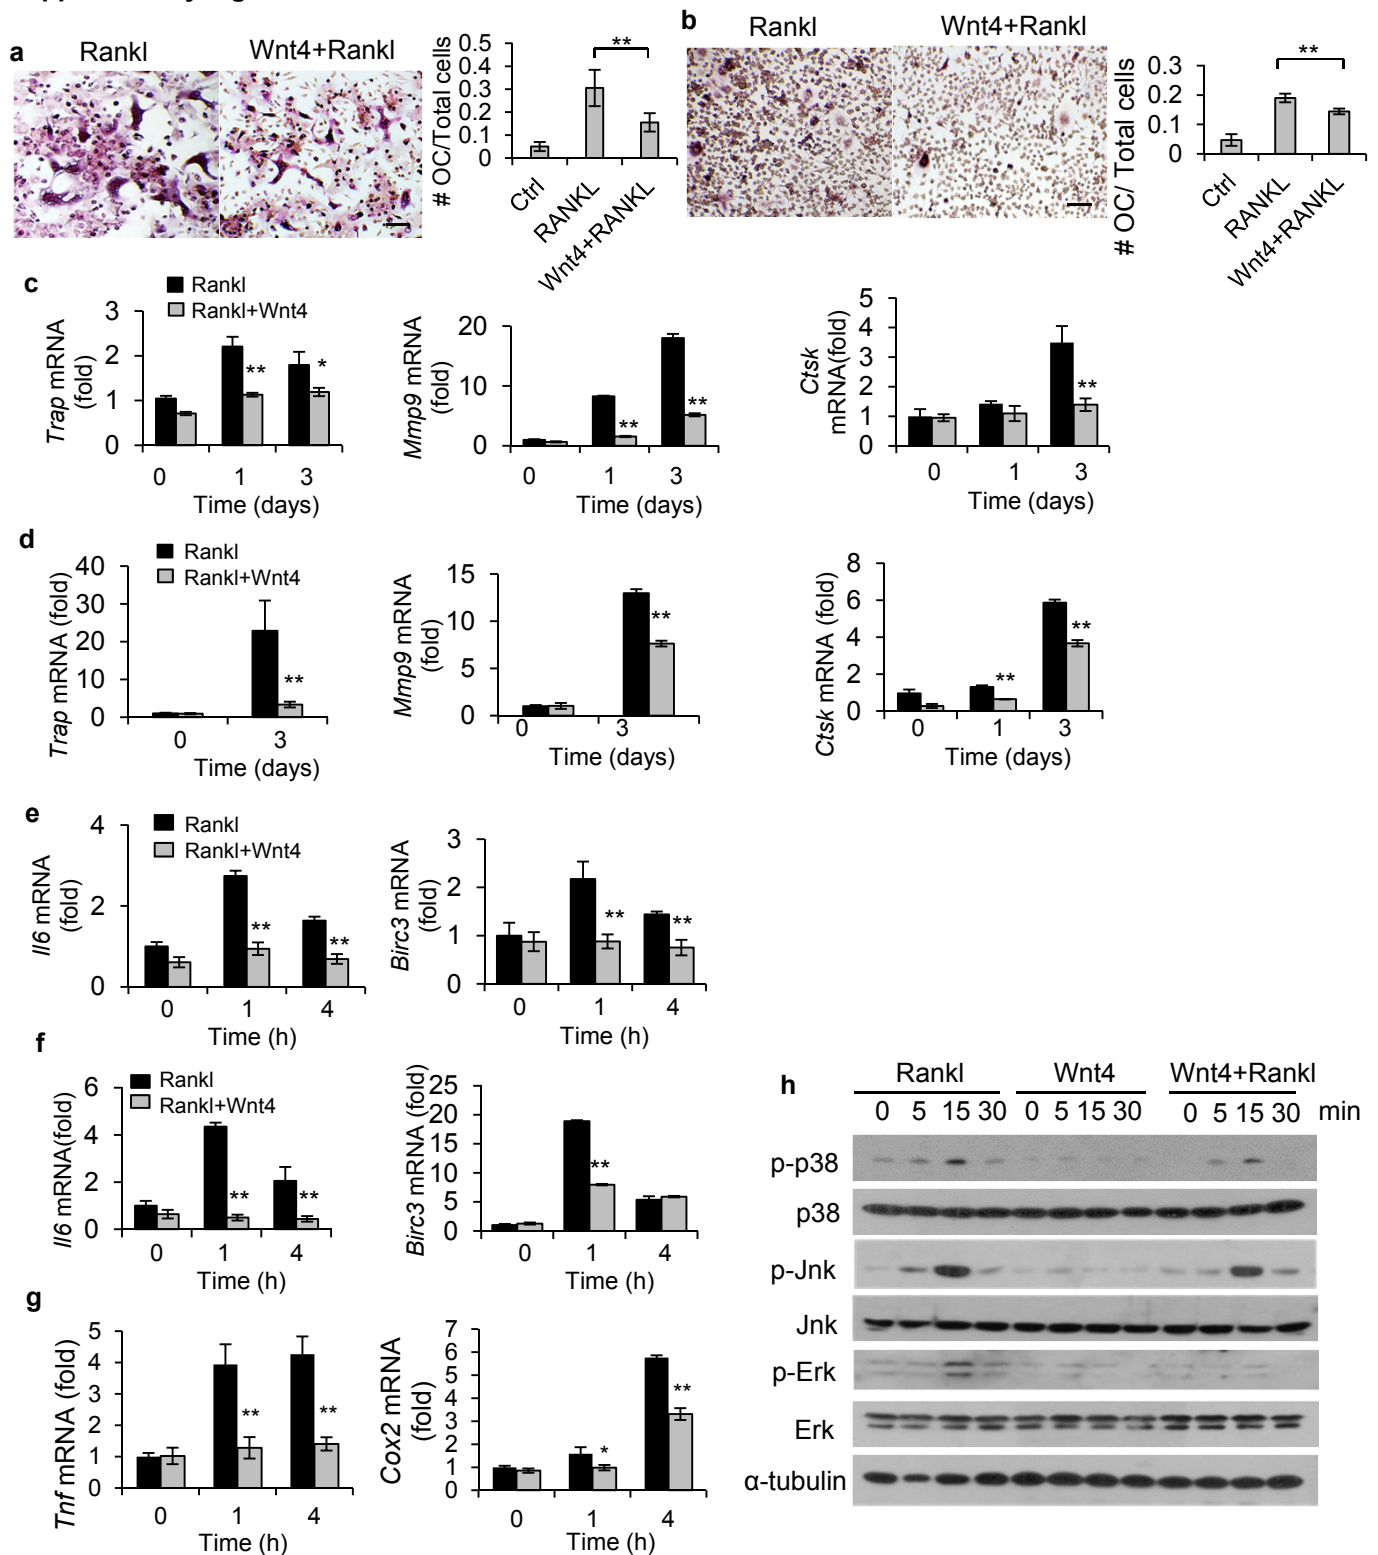

**Supplementary Figure 5.** Wnt4 directly inhibits osteoclast differentiation induced by Rankl. (a–b) TRAP staining showing osteoclast formation from bone marrow macrophages (a) and RAW264.7 cells (b) induced by Rankl or Rankl with Wnt4. (c,d) Real time RT-PCR of *Trap*, *Mmp9* and *Ctsk* mRNA in bone marrow macrophages (c) and RAW264.7 cells (d). (e,f) Real time RT-PCR of *Il6* and *Birc3* in bone marrow macrophages and RAW264.7 cells (f). (g) Real time RT-PCR of *Tnf* and *Cox-2* in bone marrow macrophages. (h) Immunoblots showing the phosphorylation of p38, Jnk, and Erk of lysates from bone marrow macrophages stimulated with Rankl, Wnt4 or Rankl with Wnt4. Scale bars, 100  $\mu$ m (a–b). \*  $P < 0.05$ ; \*\*  $P < 0.01$ .



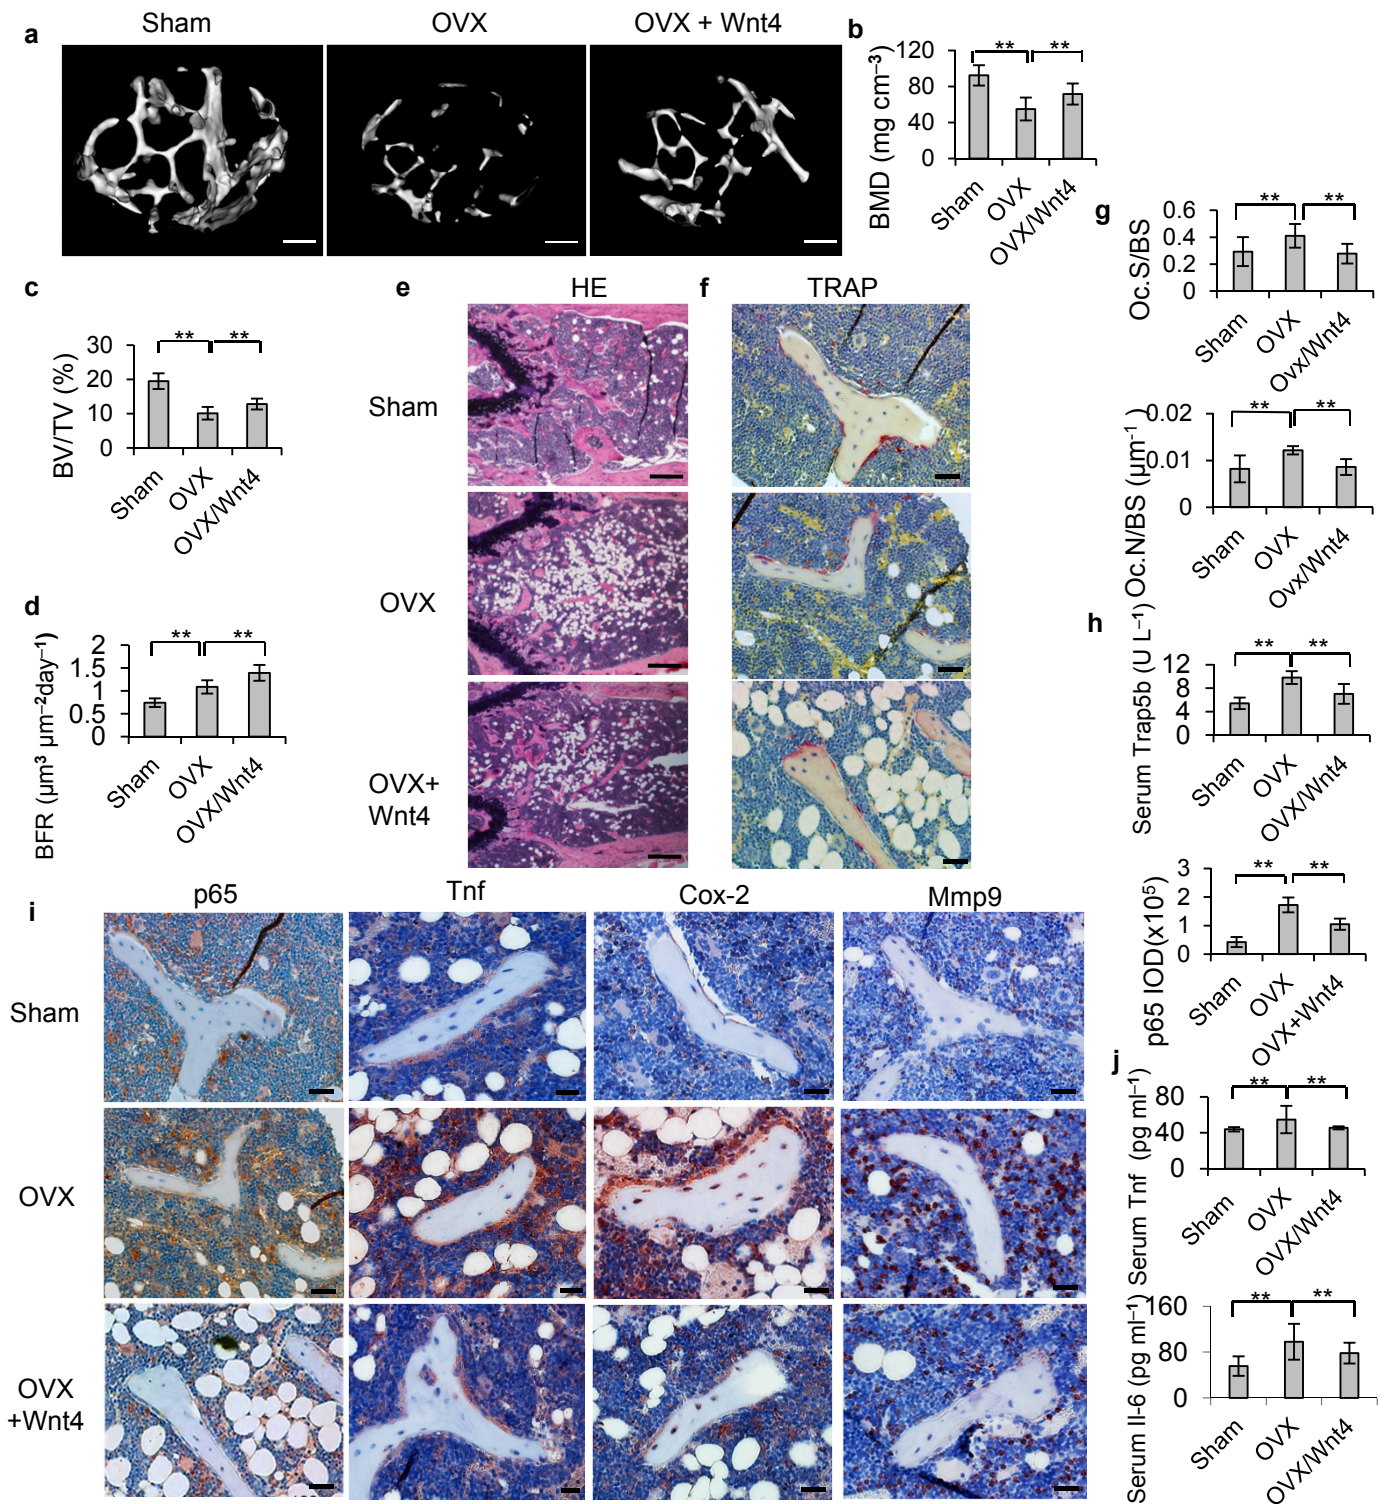

**Supplementary Figure 6** rWnt4 prevents osteoporotic bone loss by inhibiting NF-κB. (a–c)  $\mu$ CT reconstruction (a), BMD (b) and BV/TV (c) of distal femoral metaphysis regions from mice after sham operation, OVX and OVX immediately followed by rWnt4 injection. (d) BFR measurement from dual calcein labeling of mice. (e–f) H&E staining (e) and TRAP staining (f) in distal metaphysis of mice. (g) Morphometric analysis of osteoclast counts in distal femoral metaphysis. (h) ELISA of Trap5b concentrations in serum. (i) Immunostaining showing active p65, Tnf, Cox-2 and Mmp9 in distal femoral metaphysis. (j) ELISA of serum concentrations of Tnf and Il-6. For b, c, d, and g–j,  $n = 8$  mice for sham group;  $n = 12$  mice per group for mice receiving OVX and OVX with preventive rWnt4 injection. \* $P < 0.05$ , \*\* $P < 0.01$ , unpaired two-tailed t-test. Scale bars, 200  $\mu$ m (a); 300  $\mu$ m (e); 25  $\mu$ m (f) and (i).

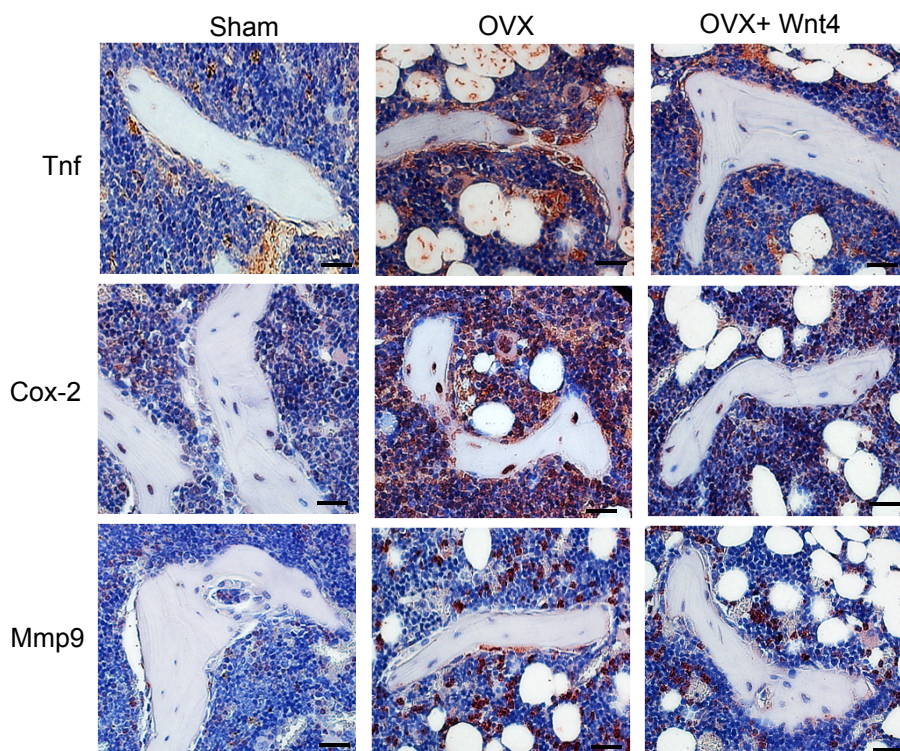

**Supplementary Figure 7** rWnt4 proteins attenuate activation of NF- $\kappa$ B-dependent molecules induced by OVX. Immunostaining of NF- $\kappa$ B-dependent Tnf, Cox-2 and Mmp9 in distal metaphysis of mice. Scale bars, 40  $\mu$ m.
